# Supplementary material for: Using Improved Ant Colony Algorithm to Investigate EMU Circulation Scheduling Problem
Source: Hindawi journal article supplement (doi:10.1155/2014/767429), 2014-01-01
Supplement: f1 [file 767429.f1.pdf]

## Timetable of tested HSR

In this table, Number “1” represents WH station, Number “2” represents GZ station and Number “3” represents CS station. In order to make computation easier, the unit of time is converted to minute, for example, “13:18” is converted to  $13*60+18=798$ .

| Departure Station | Arrival Station | Departure Time | Arrival Time | Train Number |
|-------------------|-----------------|----------------|--------------|--------------|
| 1                 | 2               | 480            | 676          | G1001        |
| 1                 | 2               | 540            | 736          | G1003        |
| 1                 | 2               | 600            | 796          | G1005        |
| 1                 | 2               | 660            | 856          | G1007        |
| 1                 | 2               | 720            | 916          | G1009        |
| 1                 | 2               | 376            | 590          | G1023        |
| 1                 | 2               | 396            | 609          | G1025        |
| 1                 | 2               | 412            | 622          | G1027        |
| 1                 | 2               | 428            | 649          | G1029        |
| 1                 | 2               | 445            | 624          | G1031        |
| 1                 | 2               | 464            | 681          | G1033        |
| 1                 | 2               | 498            | 720          | G1035        |
| 1                 | 2               | 516            | 750          | G1037        |
| 1                 | 2               | 548            | 769          | G1039        |
| 1                 | 2               | 575            | 792          | G1041        |
| 1                 | 2               | 605            | 826          | G1043        |
| 1                 | 2               | 618            | 796          | G1045        |
| 1                 | 2               | 635            | 861          | G1047        |
| 1                 | 2               | 650            | 835          | G1049        |
| 1                 | 2               | 674            | 895          | G1051        |
| 1                 | 2               | 693            | 923          | G1053        |
| 1                 | 2               | 710            | 897          | G1055        |
| 1                 | 2               | 780            | 976          | G1011        |
| 1                 | 2               | 840            | 1036         | G1013        |
| 1                 | 2               | 900            | 1096         | G1015        |
| 1                 | 2               | 960            | 1148         | G1017        |
| 1                 | 2               | 1020           | 1216         | G1019        |
| 1                 | 2               | 730            | 939          | G1057        |
| 1                 | 2               | 752            | 953          | G1059        |
| 1                 | 2               | 770            | 997          | G1061        |
| 1                 | 2               | 802            | 1022         | G1063        |
| 1                 | 2               | 816            | 1032         | G1065        |
| 1                 | 2               | 832            | 991          | G1067        |
| 1                 | 2               | 861            | 1082         | G1069        |
| 1                 | 2               | 877            | 1092         | G1071        |

---

|   |   |      |      |       |
|---|---|------|------|-------|
| 1 | 2 | 922  | 1143 | G1073 |
| 1 | 2 | 938  | 1144 | G1075 |
| 1 | 2 | 975  | 1195 | G1077 |
| 1 | 2 | 992  | 1213 | G1079 |
| 1 | 2 | 1004 | 1231 | G1081 |
| 1 | 2 | 1025 | 1253 | G1083 |
| 1 | 2 | 1049 | 1263 | G1085 |
| 1 | 2 | 1058 | 1268 | G1087 |
| 1 | 2 | 360  | 580  | G1021 |
| 1 | 2 | 1084 | 1297 | G1089 |
| 1 | 2 | 1098 | 1309 | G1091 |
| 1 | 2 | 1114 | 1292 | G1093 |
| 1 | 2 | 1130 | 1359 | G1095 |
| 1 | 2 | 1149 | 1378 | G1097 |
| 1 | 2 | 1165 | 1394 | G1099 |
| 1 | 2 | 1185 | 1414 | G1101 |
| 1 | 2 | 1212 | 1426 | G1103 |
| 2 | 1 | 480  | 676  | G1002 |
| 2 | 1 | 540  | 736  | G1004 |
| 2 | 1 | 600  | 796  | G1006 |
| 2 | 1 | 660  | 856  | G1008 |
| 2 | 1 | 720  | 916  | G1010 |
| 2 | 1 | 365  | 586  | G1024 |
| 2 | 1 | 377  | 598  | G1026 |
| 2 | 1 | 382  | 617  | G1028 |
| 2 | 1 | 393  | 629  | G1030 |
| 2 | 1 | 420  | 640  | G1032 |
| 2 | 1 | 425  | 648  | G1034 |
| 2 | 1 | 436  | 656  | G1036 |
| 2 | 1 | 445  | 683  | G1038 |
| 2 | 1 | 465  | 699  | G1040 |
| 2 | 1 | 472  | 707  | G1042 |
| 2 | 1 | 503  | 731  | G1044 |
| 2 | 1 | 533  | 764  | G1046 |
| 2 | 1 | 558  | 786  | G1048 |
| 2 | 1 | 572  | 810  | G1050 |
| 2 | 1 | 606  | 822  | G1052 |
| 2 | 1 | 625  | 845  | G1054 |
| 2 | 1 | 665  | 878  | G1056 |
| 2 | 1 | 689  | 906  | G1058 |
| 2 | 1 | 695  | 931  | G1060 |
| 2 | 1 | 780  | 976  | G1012 |
| 2 | 1 | 840  | 1158 | G1014 |
| 2 | 1 | 900  | 1096 | G1016 |

---

---

|   |   |      |      |        |
|---|---|------|------|--------|
| 2 | 1 | 960  | 1148 | G1018  |
| 2 | 1 | 1020 | 1216 | G1020  |
| 2 | 1 | 736  | 953  | G1062  |
| 2 | 1 | 753  | 983  | G1064  |
| 2 | 1 | 785  | 1000 | G1066; |
| 2 | 1 | 812  | 1032 | G1068  |
| 2 | 1 | 846  | 1067 | G1070  |
| 2 | 1 | 862  | 1082 | G1072  |
| 2 | 1 | 872  | 1109 | G1074  |
| 2 | 1 | 758  | 1115 | G1076  |
| 2 | 1 | 912  | 1140 | G1078  |
| 2 | 1 | 932  | 1164 | G1080  |
| 2 | 1 | 965  | 1187 | G1082  |
| 2 | 1 | 975  | 1195 | G1084  |
| 2 | 1 | 992  | 1223 | G1086  |
| 2 | 1 | 1001 | 1240 | G1088  |
| 2 | 1 | 1038 | 1266 | G1090  |
| 2 | 1 | 1052 | 1281 | G1092  |
| 2 | 1 | 1074 | 1308 | G1094  |
| 2 | 1 | 360  | 580  | G1022  |
| 2 | 1 | 1098 | 1327 | G1096  |
| 2 | 1 | 1112 | 1348 | G1098  |
| 2 | 1 | 1128 | 1364 | G1100  |
| 2 | 1 | 1158 | 1394 | G1102  |
| 2 | 1 | 1195 | 1433 | G1104  |
| 3 | 2 | 385  | 530  | G6001  |
| 3 | 2 | 415  | 560  | G6003  |
| 3 | 2 | 446  | 604  | G6005  |
| 3 | 2 | 483  | 621  | G6007  |
| 3 | 2 | 520  | 658  | G6009  |
| 3 | 2 | 546  | 689  | G6011  |
| 3 | 2 | 562  | 711  | G6013  |
| 3 | 2 | 585  | 723  | G6015  |
| 3 | 2 | 596  | 742  | G6017  |
| 3 | 2 | 624  | 773  | G6019  |
| 3 | 2 | 646  | 790  | G6021  |
| 3 | 2 | 678  | 816  | G6023  |
| 3 | 2 | 701  | 831  | G6025  |
| 3 | 2 | 738  | 875  | G6027  |
| 3 | 2 | 766  | 910  | G6029  |
| 3 | 2 | 797  | 928  | G6031  |
| 3 | 2 | 830  | 961  | G6033  |
| 3 | 2 | 862  | 993  | G6035  |
| 3 | 2 | 875  | 1013 | G6037  |

---

---

|   |   |      |      |       |
|---|---|------|------|-------|
| 3 | 2 | 896  | 1026 | G6039 |
| 3 | 2 | 917  | 1054 | G6041 |
| 3 | 2 | 950  | 1087 | G6043 |
| 3 | 2 | 977  | 1121 | G6045 |
| 3 | 2 | 992  | 1130 | G6047 |
| 3 | 2 | 1018 | 1163 | G6049 |
| 2 | 3 | 371  | 502  | G6002 |
| 2 | 3 | 388  | 526  | G6004 |
| 2 | 3 | 403  | 542  | G6006 |
| 2 | 3 | 414  | 556  | G6008 |
| 2 | 3 | 440  | 578  | G6010 |
| 2 | 3 | 457  | 595  | G6012 |
| 2 | 3 | 492  | 631  | G6014 |
| 2 | 3 | 518  | 657  | G6016 |
| 2 | 3 | 546  | 685  | G6018 |
| 2 | 3 | 580  | 718  | G6020 |
| 2 | 3 | 620  | 750  | G6022 |
| 2 | 3 | 638  | 777  | G6024 |
| 2 | 3 | 674  | 813  | G6026 |
| 2 | 3 | 705  | 847  | G6028 |
| 2 | 3 | 726  | 857  | G6030 |
| 2 | 3 | 741  | 879  | G6032 |
| 2 | 3 | 758  | 895  | G6034 |
| 2 | 3 | 791  | 934  | G6036 |
| 2 | 3 | 805  | 956  | G6038 |
| 2 | 3 | 831  | 975  | G6040 |
| 2 | 3 | 850  | 988  | G6042 |
| 2 | 3 | 892  | 1036 | G6044 |
| 2 | 3 | 927  | 1064 | G6046 |
| 2 | 3 | 944  | 1088 | G9948 |
| 2 | 3 | 980  | 1119 | G6050 |

---
